# Supplementary material
Source: publisher site journal article supplement (https://www.dovepress.com/article/450739)
Supplement: Supplementary file 1 [file get_supplementary_file.php]

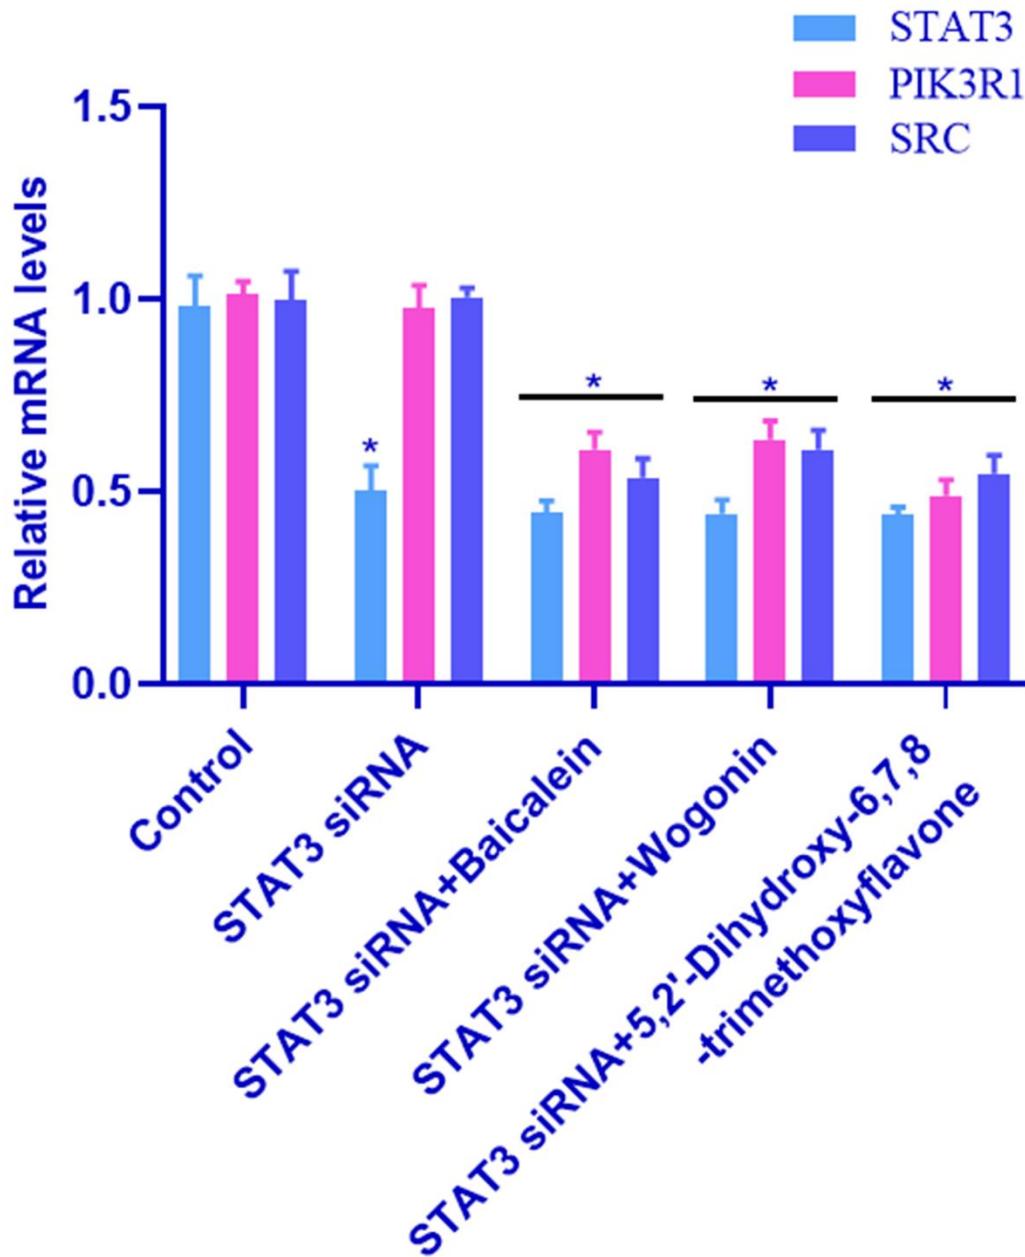

**Supplementary figure 1. Effects of *Salvia miltiorrhiza* and STAT3 siRNA on the expression of key target genes in Neuro 2A cells.** Neuro 2A cells were transfected with STAT3 siRNA and then treated with Baicalein, Wogonin, and 5,2'-Dihydroxy-6,7,8- trimethoxyflavone at 80  $\mu$ M. The mRNA levels of PIK3R1, SRC and STAT3 were detected by real-time qRT-PCR. \* $p < 0.05$  vs. Control.

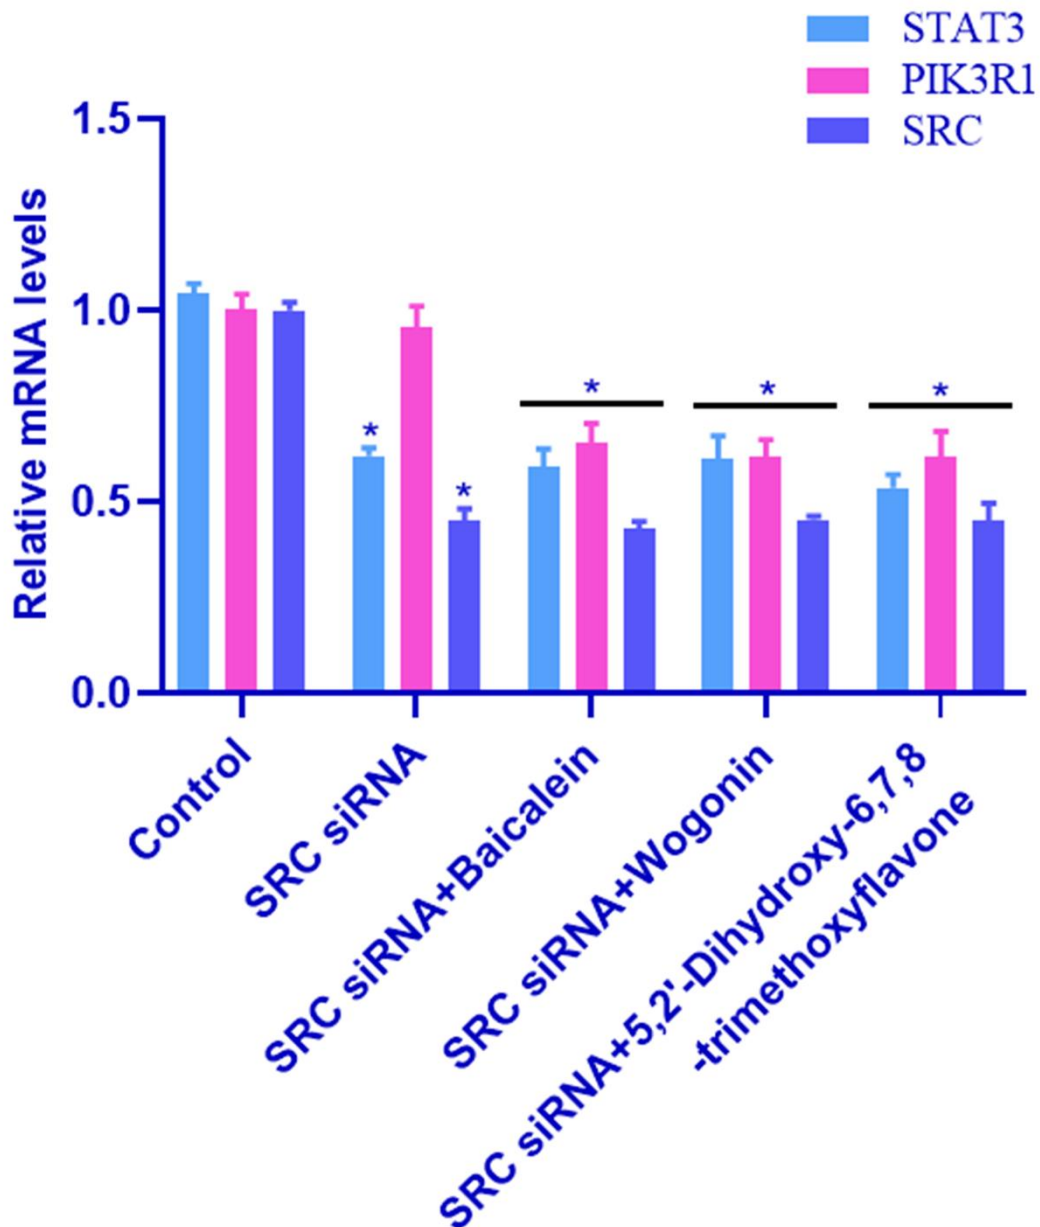

**Supplementary figure 2. Effects of *Salvia miltiorrhiza* and SRC siRNA on the expression of key target genes in Neuro 2A cells.** Neuro 2A cells were transfected with SRC siRNA and then treated with Baicalein, Wogonin, and 5,2'-Dihydroxy-6,7,8- trimethoxyflavone at 80  $\mu$ M. The mRNA levels of PIK3R1, SRC and STAT3 were detected by real-time qRT-PCR. \*p < 0.05 vs. Control.

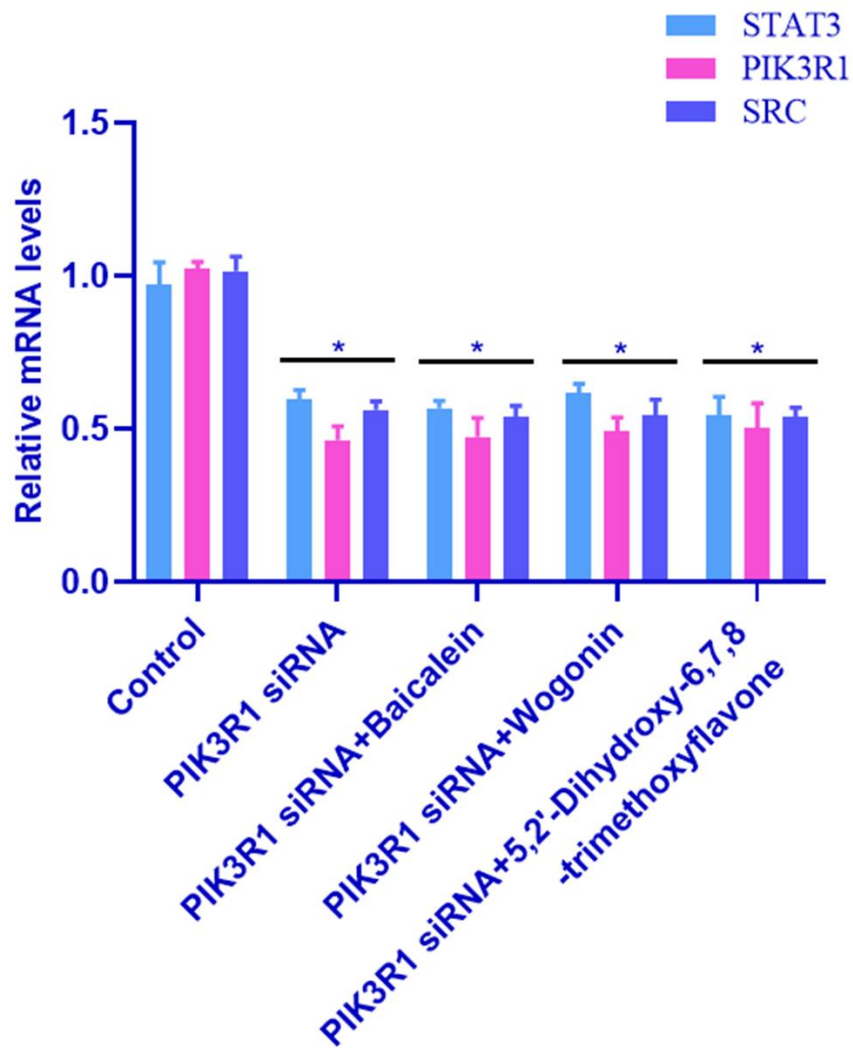

**Supplementary figure 3. Effects of *Salvia miltiorrhiza* and PIK3R1 siRNA on the expression of key target genes in Neuro 2A cells.** Neuro 2A cells were transfected with PIK3R1 siRNA and then treated with Baicalein, Wogonin, and 5,2'-Dihydroxy-6,7,8- trimethoxyflavone at 80  $\mu$ M. The mRNA levels of PIK3R1, SRC and STAT3 were detected by real-time qRT-PCR. \* $p < 0.05$  vs. Control.
